# Supplementary material for: Reduced central and peripheral inflammatory responses and increased mitochondrial activity contribute to diet-induced obesity resistance in WSB/EiJ mice
Source: PubMed Central journal article supplement (PMC6928236; doi:10.1038/s41598-019-56051-4), 2019-12-23
Supplement: 41598_2019_56051_MOESM1_ESM.pdf [file 41598_2019_56051_MOESM1_ESM.pdf]

## Supplementary Information

### **Reduced central and peripheral inflammatory responses and increased mitochondrial activity contribute to diet-induced obesity resistance in WSB/EiJ mice.**

Jérémy Terrien<sup>\*1,2</sup>, Isabelle Seugnet<sup>\*1</sup>, Bolaji Seffou<sup>#1</sup>, Maria J. Herrero<sup>#1,5</sup>, James Bowers<sup>1</sup>, Lamis Chamas<sup>1</sup>, Stéphanie Decherf<sup>1</sup>, Evelyne Duvernois-Berthet<sup>1</sup>, Chakib Djediat<sup>3</sup>, Bertrand Ducos<sup>4</sup>, Barbara A. Demeneix<sup>\$1</sup> and Marie-Stéphanie Clerget-Froidevaux<sup>\$1@</sup>

*\*, # These authors contributed equally to the work*

*\$ Co-senior authors*

*@ Corresponding author marie-stephanie.froidevaux@mnhn.fr; Tel.: +33 1 40 79 36 20*

<sup>1</sup> CNRS/MNHN UMR 7221 “Evolution des regulations endocriniennes” Department of “Life Adaptations” Muséum National d’Histoire Naturelle 57, rue Cuvier CP 32, 75231 Paris, CEDEX 05, France

<sup>2</sup> Present address : CNRS/MNHN UMR 7179, “Mécanismes Adaptatifs et Evolution”, 1 Avenue du Petit Château, 91800 Brunoy, France

<sup>3</sup> CNRS/MNHN UMR 7245 « Molécules de Communication et Adaptation des Microorganismes » 12 rue Buffon 75005 Paris

<sup>4</sup> Biology Platform of Physics Dpt High Throughput qPCR Facility of ENS LPS-ENS 24 rue Lhomond 75005 PARIS

<sup>5</sup> Present address : Center for Neuroscience Research Children's National Medical Center 111 Michigan Ave NW, Washington DC 20010

## **Supplementary material**

### **1. Material and Methods**

#### **1.1. Bioinformatic data analysis**

A custom R tool was constructed to perform the principal component analysis (PCA) using R packages: the FactoMineR (version 1.35) and missMDA (version 1.11). The PCA analysis was done starting from the dCT data for the 86 genes expression data measured by microfluidic qPCR, and the variance in the top two principal components is shown in the plots (Dim1, Dim2). Each dot represents an individual sample. Each ellipsoid represents a group strain-diet.

## 2. Supplementary figures legends:

**Figure S1. Principal component analysis (PCA) discriminates WSB/EiJ and C57BL/6J strains on the basis of hypothalamic gene expression.** Genes representative of inflammation and mitochondrial pathways were computed in a PCA analysis to verify whether the response to HFD differed between WSB/EiJ and C57BL/6J mice in ARC (upper panel) and PVN (lower panel). The individual factor maps revealed a clear discrimination between both strains around Dimension 2, especially in PVN. However, the response to HFD could not really be identified on the basis of PCA analysis. The contribution of each gene along PCA dimensions 1 and 2 is represented in Table S1 for ARC and Table S2 for PVN.

**Figure S2. Gene expression data for genes significantly more expressed in the ARC of WSB/EiJ mice compared to C57BL/6J mice:** Data were collected by microfluidic qRT-PCR from microdissected ARC of twelve week-old C57BL/6J (red) and WSB/EiJ (green) mice either maintained under control feeding (CTRL), or challenged with HFD for the last 3 days of the period (3D) or during the whole 8-week experiment duration (8WK). A: genes more expressed in the WSB/EiJ, related to mitochondria. B: genes more expressed in the WSB/EiJ, related to inflammation. Gene expression data were analyzed using non-parametric two-way Anova with permutations to test the effects of diet, strain and their interaction. Post Hoc tests results are indicated on the graph (\*,  $P \leq 0.05$ ; \*\*,  $P \leq 0.01$ ; \*\*\*,  $P \leq 0.001$ . n=5-7); FC: relative fold-change expression compared to C57BL/6J control group.

**Figure S3. Gene expression data for genes significantly more expressed in the PVN of WSB/EiJ mice compared to C57BL/6J mice:** Data were collected by microfluidic qRT-PCR from microdissected PVN of twelve week-old C57BL/6J (red) and WSB/EiJ (green) mice either maintained under control feeding (CTRL), or challenged with HFD for the last 3 days of the period (3D) or during the whole 8-week experiment duration (8WK). A: genes more expressed in the WSB/EiJ, related to mitochondria. B: genes more expressed in the WSB/EiJ, related to inflammation. Gene expression data were analyzed using non-parametric two-way Anova with permutations to test the effects of diet, strain and their interaction. Post Hoc tests results are indicated on the graph (\*,  $P \leq 0.05$ ; \*\*,  $P \leq 0.01$ ; \*\*\*,  $P \leq 0.001$ . n=5-7); FC: relative fold-change expression compared to C57BL/6J control group.

**Figure S4. Gene expression data for genes significantly less expressed in the ARC and PVN of WSB/EiJ mice compared to C57BL/6J mice** Data were collected by microfluidic

qRT-PCR from microdissected ARC and PVN of twelve week-old C57BL/6J (red) and WSB/EiJ (green) mice either maintained under control feeding (CTRL), or challenged with HFD for the last 3 days of the period (3D) or during the whole 8-week experiment duration (8WK). A: genes less expressed in the ARC of WSB/EiJ, related to mitochondria. B: genes less expressed in the ARC of WSB/EiJ, related to inflammation. C: genes less expressed in the PVN of WSB/EiJ, related to mitochondria. D: genes less expressed in the PVN of WSB/EiJ, related to inflammation. Gene expression data were analyzed using non-parametric two-way Anova with permutations to test the effects of diet, strain and their interaction. Post Hoc tests results are indicated on the graph (\*,  $P \leq 0.05$ ; \*\*,  $P \leq 0.01$ ; \*\*\*,  $P \leq 0.001$ . n=5-7); FC: relative fold-change expression compared to C57BL/6J control group.

**Figure S5. Gene expression data for genes significantly differentially regulated by HFD in the ARC and PVN of WSB/EiJ mice compared to C57BL/6J mice:** Data were collected by microfluidic qRT-PCR from microdissected ARC and PVN of twelve week-old C57BL/6J (red) and WSB/EiJ (green) mice either maintained under control feeding (CTRL), or challenged with HFD for the last 3 days of the period (3D) or during the whole 8-week experiment duration (8WK). A: genes differentially regulated in the ARC of WSB/EiJ, compared to C57BL/6J. B: genes differentially regulated by HFD in the PVN of WSB/EiJ compared to C57BL/6J, related to Mitochondria C: genes differentially regulated by HFD in the PVN of WSB/EiJ compared to C57BL/6J, related to Inflammation. Gene expression data were analyzed using non-parametric two-way Anova with permutations to test the effects of diet, strain and their interaction. Post Hoc tests results are indicated on the graph (\*,  $P \leq 0.05$ ; \*\*,  $P \leq 0.01$ ; \*\*\*,  $P \leq 0.001$ . n=5-7); FC: relative fold-change expression compared to C57BL/6J control group.

### 3. Supplementary tables legends

**Table S1. Summary table of the statistics regarding PCA and gene expression analyses for the ARC;** *PCA (yellow tables):* list of genes showing a significant contribution to PCA dimension 2 (which discriminates C57BL/6J and WSB/EiJ mice (Figure S1)), classify according to the pval of their correlation to the dimension 2 (the data positively correlated to dim 2 are given at the top of the table, the data negatively correlated to dim 2 are given at the bottom of the table). The genes were classified after the PCA accordingly to their involvement in the inflammatory, mitochondrial or both pathways (using Kegg or Genomatix tools). Finally, the significant contributions to dimension 2 of the Strain\*Diet interaction, the C57BL/6J 3d-HFD group and the WSB/EiJ 8w-HFD group are also provided (bottom table). *Microfluidics qPCR data statistical analyses (non-parametric two-way ANOVA with permutations) (blue table):* The effects of Strain, Diet and Strain\*Diet were statistically tested for each gene from qPCR data (NS (not significant): p-Value  $\geq 0.05$ ).

**Table S2. Summary table of the statistics regarding PCA and gene expression analyses for the PVN;** *PCA (yellow tables):* list of genes showing a significant contribution to PCA dimension 2 (which discriminates C57BL/6J and WSB/EiJ mice (Figure S1)), classify according to the pval of their correlation to the dimension 2 (the data positively correlated to dim 2 are given at the top of the table, the data negatively correlated to dim 2 are given at the bottom of the table). The genes were classified after the PCA accordingly to their involvement in the inflammatory, mitochondrial or both pathways (using Kegg or Genomatix tools). Finally, the significant contributions to dimension 2 of the Strain\*Diet interaction, the C57BL/6J 3d-HFD group, the WSB/EiJ Control group and the WSB/EiJ 8w-HFD group are also provided (bottom table). *Microfluidics qPCR data statistical analyses (non-parametric two-way ANOVA with permutations) (blue table):* The effects of Strain, Diet and Strain\*Diet were statistically tested for each gene from qPCR data (NS (not significant): p-Value  $\geq 0.05$ ).

**Table S3.** List of the genes included in the Heatmap representation and corresponding Taqman primers and probe used for the gene expression analysis for both the arcuate nuclei of the hypothalamus (Figure 8) and the paraventricular nuclei of the hypothalamus (Figure 9).

Figure S1

ARC

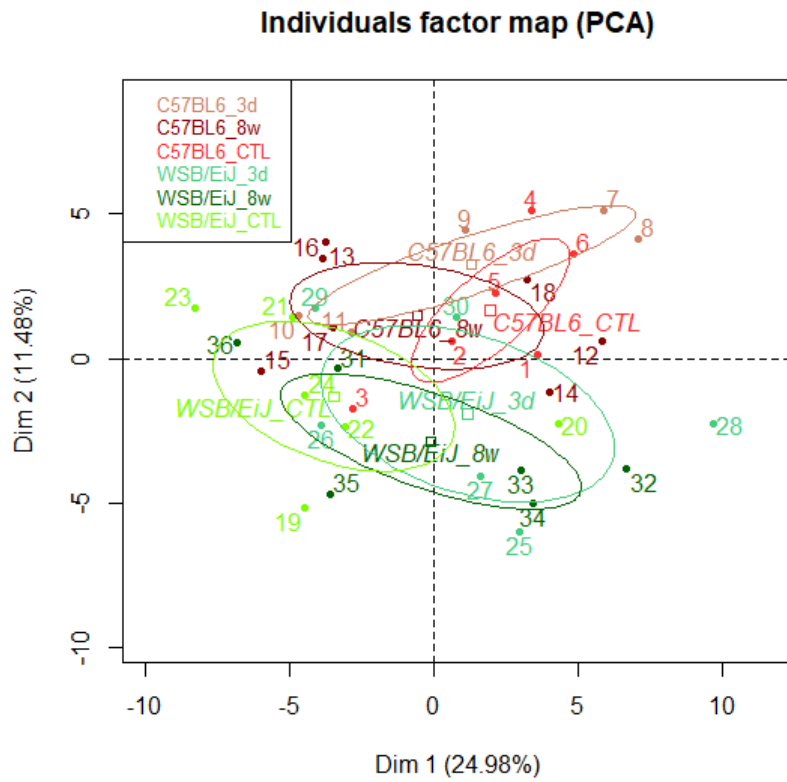

PVN

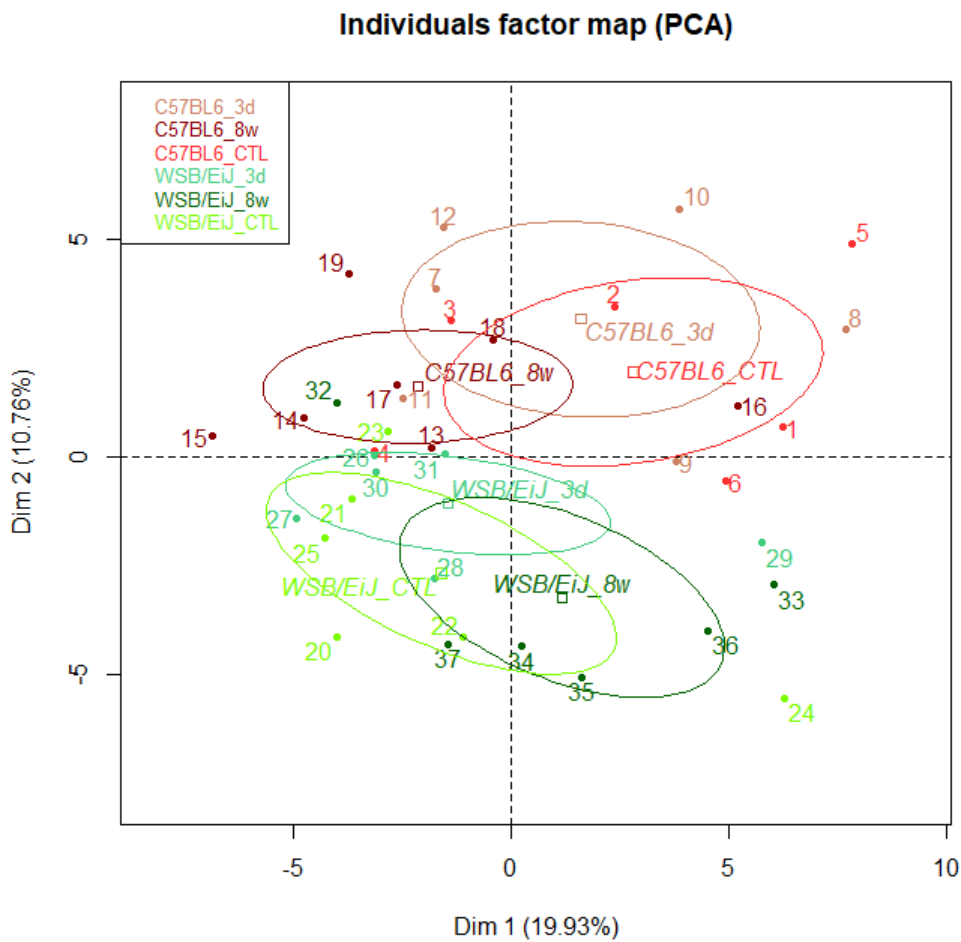

Figure S2

A : ARC : genes more expressed in the WSB/EiJ, related to mitochondria

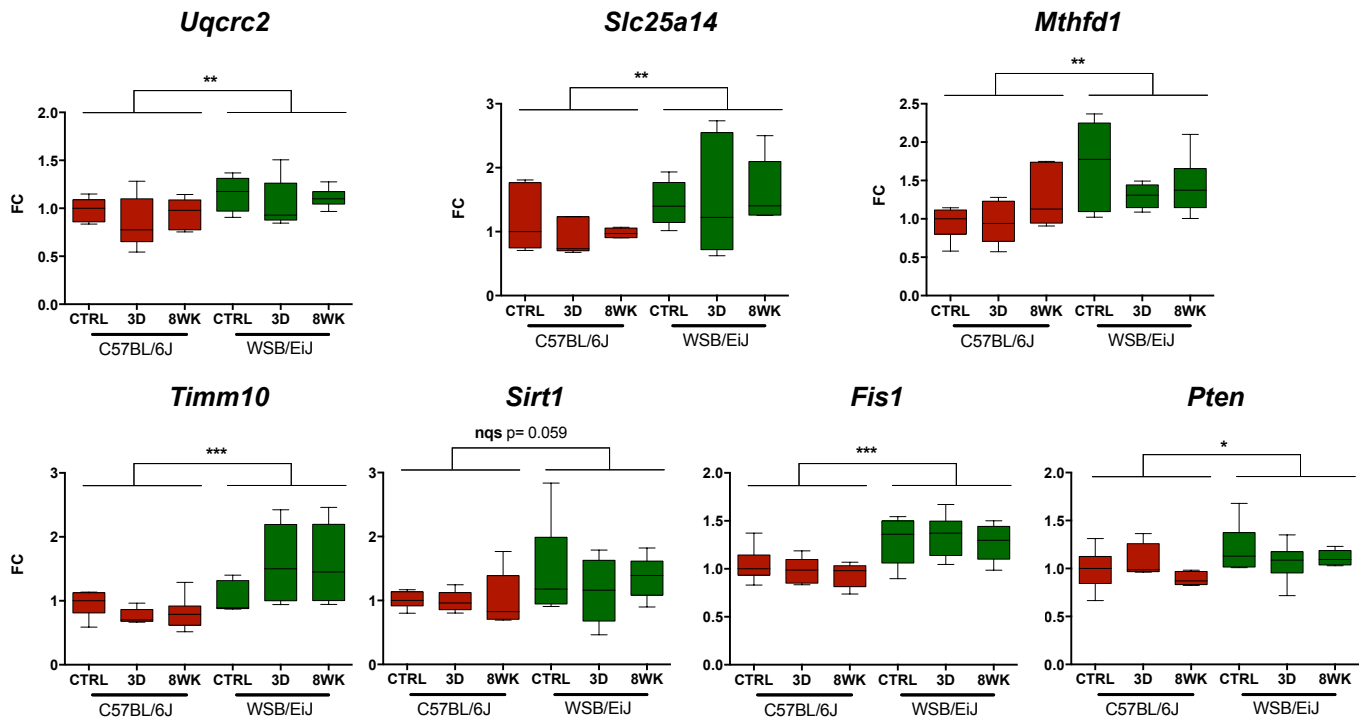

B: ARC : genes more expressed in the WSB/EiJ, related to inflammation

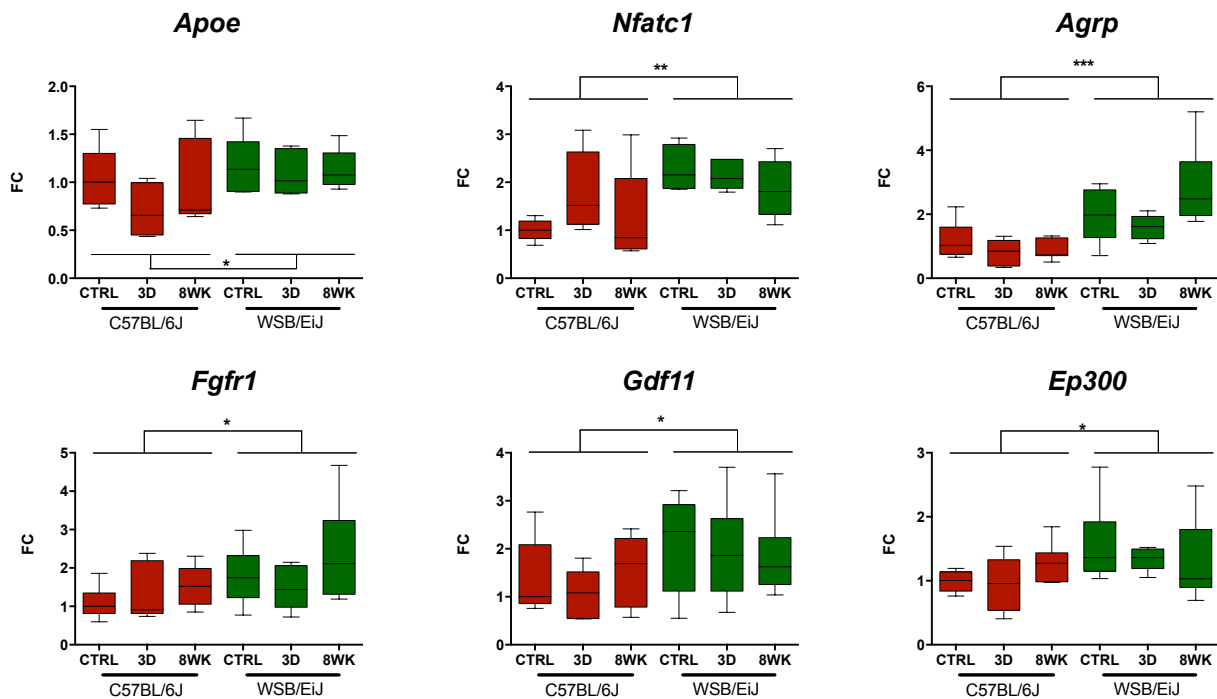

Figure S3

A : PVN: genes more expressed in the WSB/EiJ, related to mitochondria

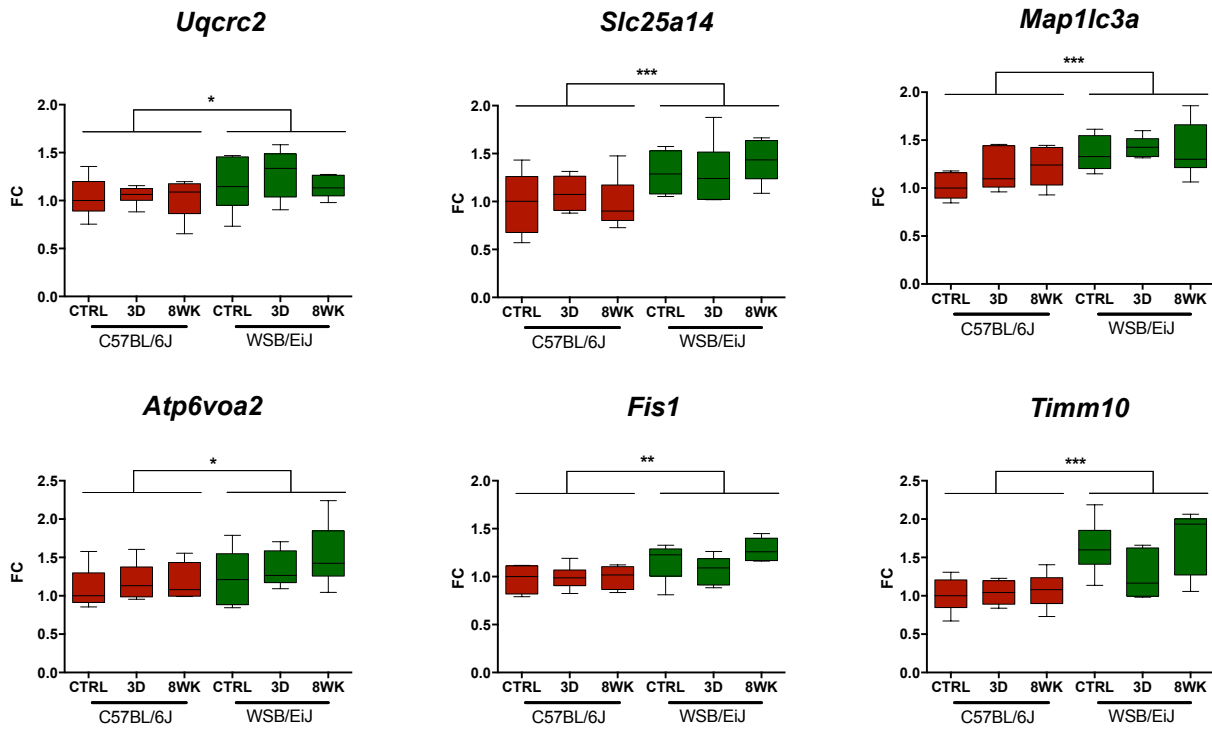

B: PVN: genes more expressed in the WSB/EiJ, related to inflammation

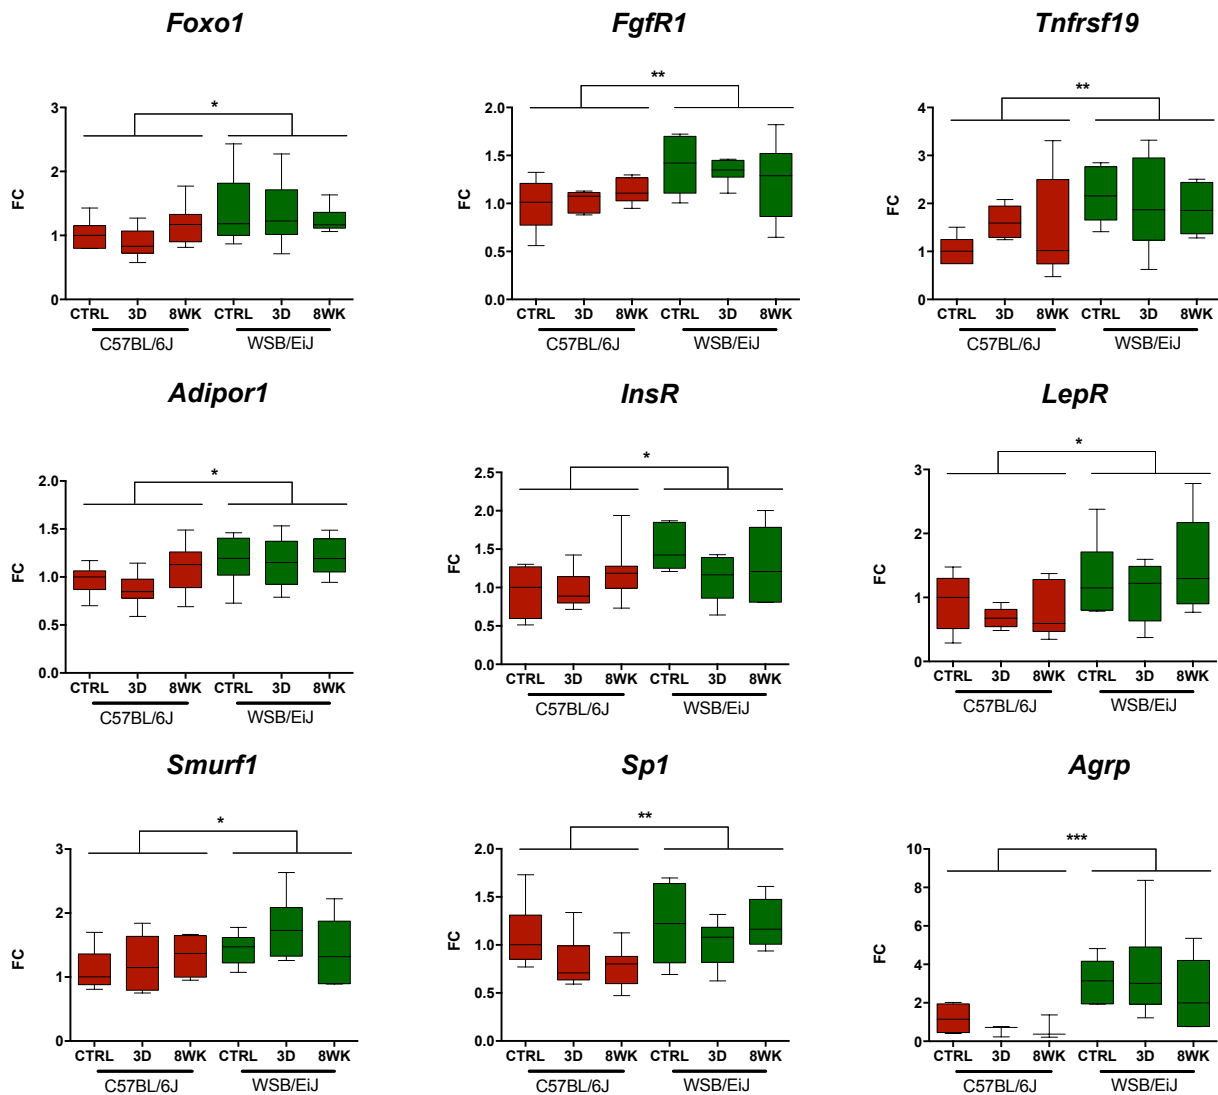



Figure S4

A: ARC : genes less expressed in the WSB/EiJ, related to mitochondria

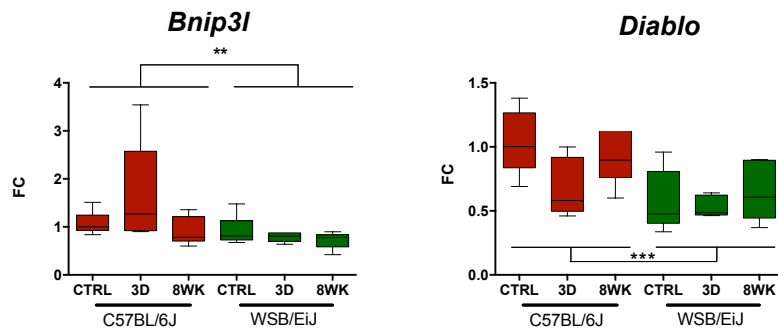

B: ARC : genes less expressed in the WSB/EiJ, related to inflammation

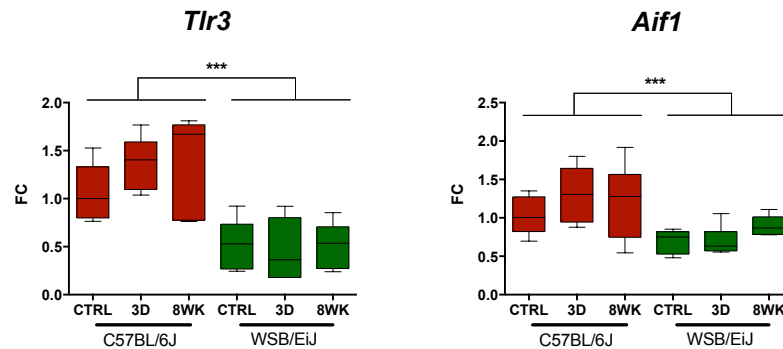

C: PVN: genes less expressed in the WSB/EiJ, related to mitochondria

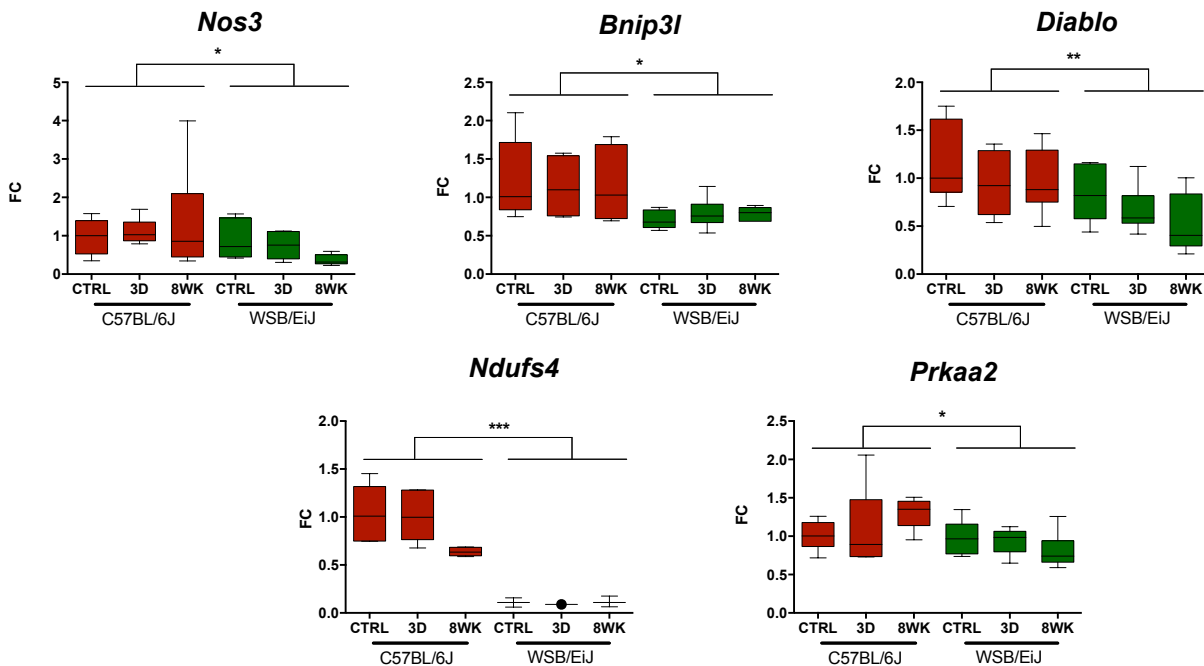

D: PVN: genes less expressed in the WSB/EiJ, related to inflammation

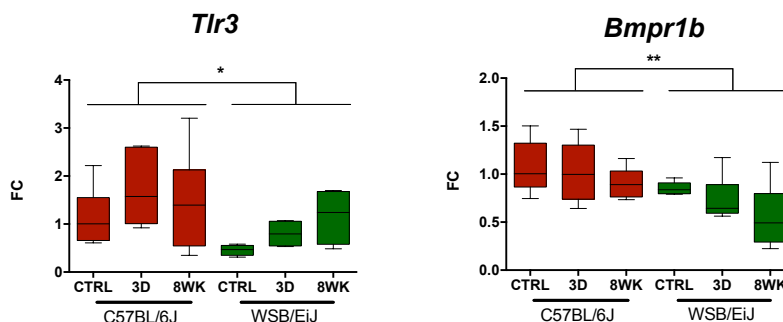

Figure S5

A: ARC : genes differentially regulated by HFD

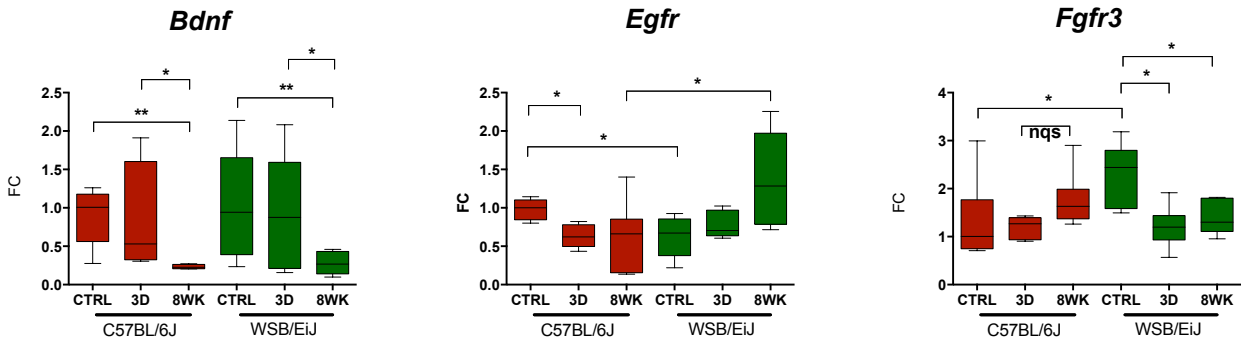

B: PVN: genes differentially regulated by HFD, related to Mitochondria

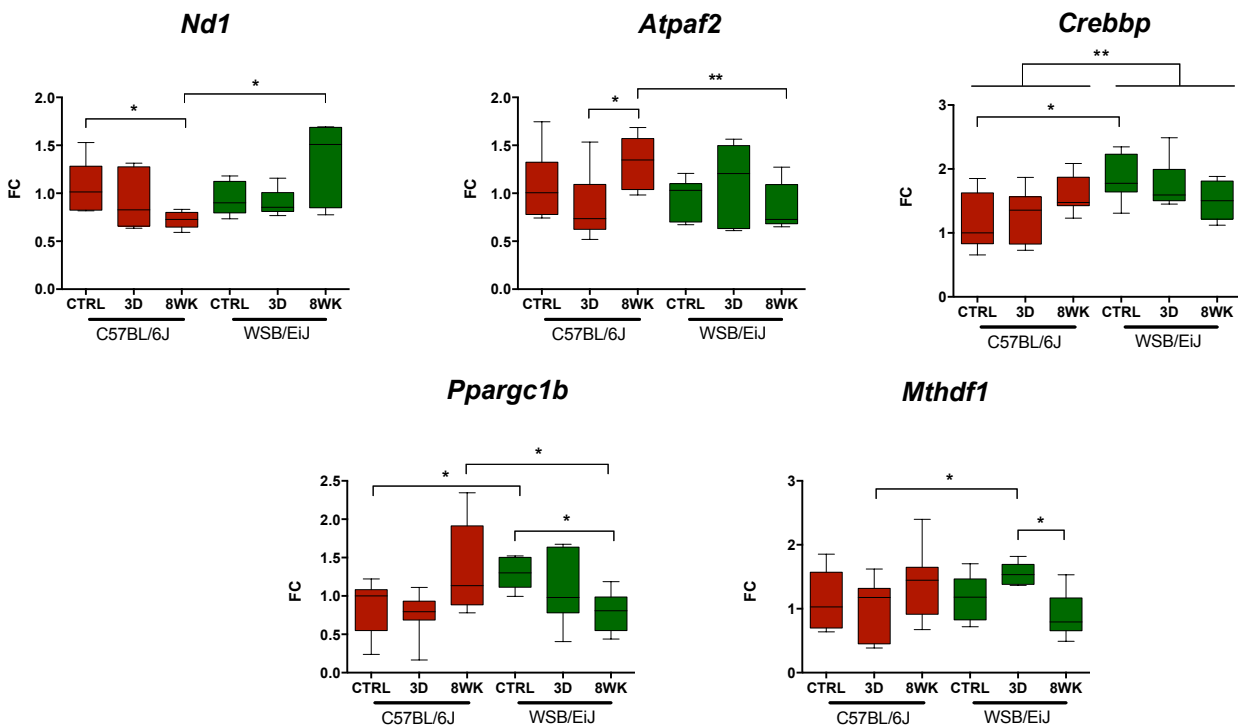

C: PVN: genes differentially regulated by HFD, related to Inflammation

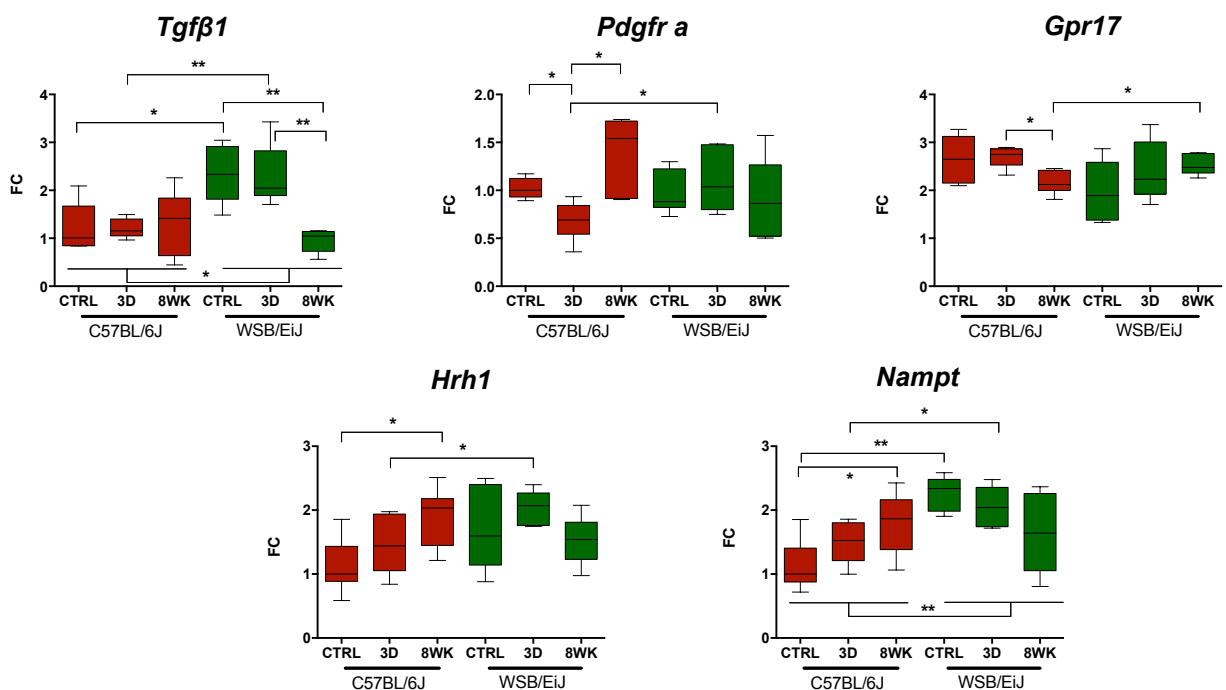

| PCA analysis       |             |              | Gene expression : Anova two-way analysis (p-value) |       |             |
|--------------------|-------------|--------------|----------------------------------------------------|-------|-------------|
| Inflammatory Genes | Correlation | p-value      | Strain                                             | Diet  | Strain*Diet |
| AGRP               | 0.6299855   | 3.834689e-05 | 0.0001                                             | NS    | NS          |
| APOE               | 0.6092040   | 8.039549e-05 | 0.01                                               | NS    | NS          |
| ADIPOR2            | 0.4768486   | 3.278060e-03 | NS                                                 | NS    | NS          |
| NFATC1             | 0.4637315   | 4.390677e-03 | 0.003                                              | NS    | NS          |
| LEPR               | 0.4487643   | 6.046190e-03 | NS                                                 | NS    | NS          |
| MTOR               | 0.4418437   | 6.977474e-03 | 0.015                                              | NS    | NS          |
| FOXO3              | 0.4271551   | 9.368151e-03 | NS                                                 | NS    | NS          |
| FLT1               | 0.4088164   | 1.330187e-02 | NS                                                 | NS    | NS          |
| INSR               | 0.4087146   | 1.332710e-02 | 0.011                                              | NS    | 0.038       |
| CAMKK1             | 0.4063385   | 1.392742e-02 | NS                                                 | NS    | NS          |
| BMPR1B             | 0.3593074   | 3.138057e-02 | NS                                                 | NS    | NS          |
| NAMPT              | 0.3391575   | 4.301666e-02 | NS                                                 | NS    | NS          |
| TNFRSF19           | 0.3335142   | 4.683527e-02 | NS                                                 | 0.041 | NS          |
| AKT1               | -0.4062526  | 1.394955e-02 | NS                                                 | NS    | NS          |
| TLR3               | -0.4407558  | 7.134517e-03 | 0.0001                                             | NS    | NS          |
| Aif1               | -0.5104206  | 1.469956e-03 | 0.0003                                             | NS    | NS          |

| PCA analysis        |             |              | Gene expression : Anova two-way analysis (p-value) |      |             |
|---------------------|-------------|--------------|----------------------------------------------------|------|-------------|
| Mitochondrial Genes | Correlation | p-value      | Strain                                             | Diet | Strain*Diet |
| FIS1                | 0.7970217   | 6.010403e-09 | 0.0001                                             | NS   | NS          |
| SLC25A14            | 0.7292671   | 4.538424e-07 | 0.001                                              | NS   | NS          |
| TIMM10              | 0.6005982   | 1.076128e-04 | 0.0001                                             | NS   | NS          |
| Mthfd1              | 0.5512716   | 4.928296e-04 | NS                                                 | NS   | NS          |
| COX1                | 0.5126538   | 1.389519e-03 | NS                                                 | NS   | NS          |
| ND4                 | 0.4628941   | 4.471645e-03 | NS                                                 | NS   | NS          |
| UQCRC2              | 0.4479421   | 6.150910e-03 | 0.007                                              | NS   | NS          |
| SLC25A25            | 0.3897421   | 1.878896e-02 | NS                                                 | NS   | NS          |
| ND5.315             | 0.3799560   | 2.226845e-02 | NS                                                 | NS   | NS          |
| NDUFV1              | 0.3661010   | 2.809522e-02 | NS                                                 | NS   | NS          |
| COX2                | 0.3449645   | 3.935374e-02 | NS                                                 | NS   | NS          |
| CYTB                | 0.3324096   | 4.761368e-02 | NS                                                 | NS   | NS          |
| NOS3                | -0.4013289  | 1.526803e-02 | NS                                                 | NS   | NS          |
| BNIP3L              | -0.6589090  | 1.245651e-05 | 0.003                                              | NS   | NS          |

| PCA analysis                       |             |              | Gene expression : Anova two-way analysis (p-value) |      |             |
|------------------------------------|-------------|--------------|----------------------------------------------------|------|-------------|
| Mitochondrial & Inflammation Genes | Correlation | p-value      | Strain                                             | Diet | Strain*Diet |
| PRKAA1                             | 0.6668572   | 8.953016e-06 | NS                                                 | NS   | NS          |
| SP1                                | 0.5094851   | 1.504849e-03 | NS                                                 | NS   | NS          |
| SIRT1                              | 0.4346040   | 8.080727e-03 | 0.041                                              | NS   | NS          |
| PRKAA2                             | 0.3334260   | 4.689706e-02 | NS                                                 | NS   | NS          |

| \$Dim.2\$ QUALI    |           |             |
|--------------------|-----------|-------------|
|                    | R2        | p.value     |
| Strain*Diet        | 0.483942  | 0.000896946 |
| \$Dim.2\$ CATEGORY |           |             |
|                    | Estimate  | p.value     |
| C57BL6_3d          | 3.190887  | 0.01045966  |
| WSB/Eij_8w         | -2.917066 | 0.01173892  |

Tableau S1 ARC

| PCA analysis       |             |              | Gene expression : Anova two-way analysis (p-value) |       |             |
|--------------------|-------------|--------------|----------------------------------------------------|-------|-------------|
| Inflammatory Genes | Correlation | p-value      | Strain                                             | Diet  | Strain*Diet |
| LEPR               | 0.5392343   | 5.736239e-04 | 0.006                                              | NS    | NS          |
| FOXO3              | 0.5190579   | 9.957747e-04 | 0.004                                              | NS    | NS          |
| BDNF               | 0.4876658   | 2.201794e-03 | 0.024                                              | 0.039 | NS          |
| INSR               | 0.4544265   | 4.721540e-03 | 0.021                                              | NS    | NS          |
| FOXO1              | 0.4371529   | 6.820992e-03 | 0.013                                              | NS    | NS          |
| ADIPOR1            | 0.4266150   | 8.460876e-03 | 0.004                                              | NS    | NS          |
| HIF1A              | 0.4075326   | 1.229405e-02 | NS                                                 | NS    | NS          |
| ADIPOR2            | 0.3539784   | 3.160265e-02 | NS                                                 | NS    | NS          |
| GDF11              | 0.3274419   | 4.789413e-02 | NS                                                 | NS    | NS          |
| IRS1               | 0.3264445   | 4.861798e-02 | NS                                                 | NS    | NS          |
| TLR3               | -0.4445886  | 5.835337e-03 | 0.006                                              | NS    | NS          |
| BMPRI1B            | -0.4905202  | 2.054803e-03 | 0.002                                              | 0.045 | NS          |

| PCA analysis        |             |              | Gene expression : Anova two-way analysis (p-value) |      |             |
|---------------------|-------------|--------------|----------------------------------------------------|------|-------------|
| Mitochondrial Genes | Correlation | p-value      | Strain                                             | Diet | Strain*Diet |
| FIS1                | 0.6360935   | 2.324651e-05 | 0.002                                              | NS   | NS          |
| TIMM10              | 0.6282510   | 3.138049e-05 | 0.0001                                             | NS   | NS          |
| CYTB                | 0.5847288   | 1.443936e-04 | 0.047                                              | NS   | NS          |
| ND4                 | 0.5755543   | 1.938533e-04 | NS                                                 | NS   | NS          |
| ND2                 | 0.5608728   | 3.051240e-04 | NS                                                 | NS   | NS          |
| ND5.315             | 0.5386409   | 5.832932e-04 | NS                                                 | NS   | NS          |
| ND1                 | 0.5360994   | 6.263681e-04 | NS                                                 | NS   | NS          |
| COX2                | 0.5051904   | 1.427020e-03 | NS                                                 | NS   | NS          |
| COX1                | 0.4563307   | 4.528668e-03 | NS                                                 | NS   | NS          |
| ND6.325             | 0.4354853   | 7.060683e-03 | NS                                                 | NS   | NS          |
| SLC25A14            | 0.4148234   | 1.068456e-02 | 0.002                                              | NS   | NS          |
| ATP6V0A2            | 0.3588765   | 2.916285e-02 | 0.03                                               | NS   | NS          |
| MFN1                | 0.3247922   | 4.983646e-02 | NS                                                 | NS   | NS          |
| NOS3                | -0.4071684  | 1.237956e-02 | 0.011                                              | NS   | NS          |
| DIABLO              | -0.4875989  | 2.205347e-03 | 0.001                                              | NS   | NS          |
| NDUFS4              | -0.5753327  | 1.952163e-04 | 0.0001                                             | NS   | NS          |

| PCA analysis                       |             |              | Gene expression : Anova two-way analysis (p-value) |      |             |
|------------------------------------|-------------|--------------|----------------------------------------------------|------|-------------|
| Mitochondrial & Inflammation Genes | Correlation | p-value      | Strain                                             | Diet | Strain*Diet |
| DNM1L                              | 0.4821486   | 2.512209e-03 | NS                                                 | NS   | NS          |
| CREBBP                             | 0.4627668   | 3.926364e-03 | 0.003                                              | NS   | 0.032       |
| SP1                                | 0.6471078   | 1.503648e-05 | 0.002                                              | NS   | NS          |
| PRKAA1                             | 0.3414740   | 3.859794e-02 | NS                                                 | NS   | 0.031       |

| \$Dim.2\$ QUALI    |           |              |
|--------------------|-----------|--------------|
|                    | R2        | p.value      |
| Strain*Diet        | 0.6414819 | 3.465914e-06 |
| \$Dim.2\$ CATEGORY |           |              |
|                    | Estimate  | p.value      |
| C57BL6_3d          | 3.217381  | 0.003453725  |
| WSB/EiJ_CTL        | -2.565432 | 0.018532461  |
| WSB/EiJ_8w         | -3.239763 | 0.002357155  |

Tableau S2 : PVN

Gene List used for heatmap

| MGI Gene/Marker ID | Symbol   | Name                                                                                                                                 | Entrez Gene ID | Assay ID      |
|--------------------|----------|--------------------------------------------------------------------------------------------------------------------------------------|----------------|---------------|
| MGI:87986          | Akt1     | thymoma viral proto-oncogene 1                                                                                                       | 11651          | Mm01331626_m1 |
| MGI:1261423        | Casp8    | caspase 8                                                                                                                            | 12370          | Mm00802247_m1 |
| MGI:1097153        | Cx3cl1   | chemokine (C-X3-C motif) ligand 1                                                                                                    | 20312          | Mm00436454_m1 |
| MGI:95522          | Fgfr1    | fibroblast growth factor receptor 1                                                                                                  | 14182          | Mm00438930_m1 |
| MGI:1890077        | Foxo1    | forkhead box O1                                                                                                                      | 56458          | Mm00490672_m1 |
| MGI:1861437        | Gsk3b    | glycogen synthase kinase 3 beta                                                                                                      | 56637          | Mm00444911_m1 |
| MGI:1349419        | Aifm1    | apoptosis-inducing factor, mitochondrion-associated 1                                                                                | 26926          | Mm00442540_m1 |
| MGI:88057          | Apoe     | apolipoprotein E                                                                                                                     | 11816          | Mm01307193_g1 |
| MGI:88145          | Bdnf     | brain derived neurotrophic factor                                                                                                    | 12064          | Mm04230607_s1 |
| MGI:107191         | Bmpr1b   | bone morphogenetic protein receptor, type 1B                                                                                         | 12167          | Mm03023971_m1 |
| MGI:1322659        | Bnip3l   | BCL2/adenovirus E1B interacting protein 3-like                                                                                       | 12177          | Mm00786306_s1 |
| MGI:1913843        | Diablo   | diablo homolog (Drosophila)                                                                                                          | 66593          | Mm01194441_m1 |
| MGI:1276116        | Ep300    | E1A binding protein p300                                                                                                             | 328572         | Mm00625535_m1 |
| MGI:1915661        | Map1lc3a | microtubule-associated protein 1 light chain 3 alpha                                                                                 | 66734          | Mm00458724_m1 |
| MGI:1914693        | Map1lc3b | microtubule-associated protein 1 light chain 3 beta                                                                                  | 67443          | Mm00782868_sH |
| MGI:97250          | Myc      | myelocytomatosis oncogene                                                                                                            | 17869          | Mm00487804_m1 |
| MGI:102469         | Nfatc1   | nuclear factor of activated T cells, cytoplasmic, calcineurin dependent 1                                                            | 18018          | Mm00479445_m1 |
| MGI:97530          | Pdgfra   | platelet derived growth factor receptor, alpha polypeptide                                                                           | 18595          | Mm00440701_m1 |
| MGI:109583         | Pten     | phosphatase and tensin homolog                                                                                                       | 19211          | Mm00477208_m1 |
| MGI:2135607        | Sirt1    | sirtuin 1                                                                                                                            | 93759          | Mm00490758_m1 |
| MGI:107810         | Tfam     | transcription factor A, mitochondrial                                                                                                | 21780          | Mm00447485_m1 |
| MGI:98725          | Tgfb1    | transforming growth factor, beta 1                                                                                                   | 21803          | Mm01178820_m1 |
| MGI:2385459        | Socs5    | suppressor of cytokine signaling 5                                                                                                   | 56468          | Mm00465631_s1 |
| MGI:1352474        | Tnfrsf19 | tumor necrosis factor receptor superfamily, member 19                                                                                | 29820          | Mm00443506_m1 |
| MGI:1914664        | Mfn1     | mitofusin 1                                                                                                                          | 67414          | Mm00612599_m1 |
| MGI:2442230        | Mfn2     | mitofusin 2                                                                                                                          | 170731         | Mm00500120_m1 |
| MGI:98372          | Sp1      | trans-acting transcription factor 1                                                                                                  | 20683          | Mm00489039_m1 |
| MGI:104855         | Atp6v0a2 | ATPase, H+ transporting, lysosomal V0 subunit A2                                                                                     | 21871          | Mm00441838_m1 |
| MGI:2180561        | Atpaf2   | ATP synthase mitochondrial F1 complex assembly factor 2                                                                              | 246782         | Mm00520660_m1 |
| MGI:1921256        | Dnm1l    | dynamamin 1-like                                                                                                                     | 74006          | Mm01342903_m1 |
| MGI:1913687        | Fis1     | fission 1 (mitochondrial outer membrane) homolog (yeast)                                                                             | 66437          | Mm00481580_m1 |
| MGI:1338027        | Gdf11    | growth differentiation factor 11                                                                                                     | 14561          | Mm01159973_m1 |
| MGI:102504         | mt-Co1   | mitochondrially encoded cytochrome c oxidase I                                                                                       | 17708          | Mm04225243_g1 |
| MGI:102503         | mt-Co2   | mitochondrially encoded cytochrome c oxidase II                                                                                      | 17709          | Mm03294838_g1 |
| MGI:102501         | mt-Cytb  | mitochondrially encoded cytochrome b                                                                                                 | 17711          | Mm04225271_g1 |
| MGI:101787         | mt-Nd1   | mitochondrially encoded NADH dehydrogenase 1                                                                                         | 17716          | Mm04225274_s1 |
| MGI:102500         | mt-Nd2   | mitochondrially encoded NADH dehydrogenase 2                                                                                         | 17717          | Mm04225288_s1 |
| MGI:102498         | mt-Nd4   | mitochondrially encoded NADH dehydrogenase 4                                                                                         | 17719          | Mm04225294_s1 |
| MGI:102496         | mt-Nd5   | mitochondrially encoded NADH dehydrogenase 5                                                                                         | 17721          | Mm04225315_s1 |
| MGI:102495         | mt-Nd6   | mitochondrially encoded NADH dehydrogenase 6                                                                                         | 17722          | Mm04225325_g1 |
| MGI:1343135        | Ndufs4   | NADH dehydrogenase (ubiquinone) Fe-S protein 4                                                                                       | 17993          | Mm00656176_m1 |
| MGI:107851         | Ndufv1   | NADH dehydrogenase (ubiquinone) flavoprotein 1                                                                                       | 17995          | Mm00504941_m1 |
| MGI:1330823        | Slc25a14 | solute carrier family 25 (mitochondrial carrier, brain), member 14                                                                   | 20523          | Mm00488302_m1 |
| MGI:1915913        | Slc25a25 | solute carrier family 25 (mitochondrial carrier, phosphate carrier), member 25                                                       | 227731         | Mm00525104_m1 |
| MGI:1921261        | Slc25a27 | solute carrier family 25, member 27                                                                                                  | 74011          | Mm00511820_m1 |
| MGI:98443          | Surf1    | surfeit gene 1                                                                                                                       | 20930          | Mm00489041_g1 |
| MGI:1353429        | Timm10   | translocase of inner mitochondrial membrane 10                                                                                       | 30059          | Mm00443538_m1 |
| MGI:1914253        | Uqcrc2   | ubiquinol cytochrome c reductase core protein 2                                                                                      | 67003          | Mm00445961_m1 |
| MGI:1919924        | Adipor1  | adiponectin receptor 1                                                                                                               | 72674          | Mm01291334_mH |
| MGI:892013         | AgRP     | agouti related neuropeptide                                                                                                          | 11604          | Mm00475829_g1 |
| MGI:1890081        | Foxo3    | forkhead box O3                                                                                                                      | 56484          | Mm01185722_m1 |
| MGI:1338071        | Ikbkb    | inhibitor of kappaB kinase beta                                                                                                      | 16150          | Mm01222247_m1 |
| MGI:96575          | Insr     | insulin receptor                                                                                                                     | 16337          | Mm01211875_m1 |
| MGI:99454          | Irs1     | insulin receptor substrate 1                                                                                                         | 16367          | Mm01278327_m1 |
| MGI:104993         | Lepr     | leptin receptor                                                                                                                      | 16847          | Mm00440181_m1 |
| MGI:1928394        | Mtor     | mechanistic target of rapamycin (serine/threonine kinase)                                                                            | 56717          | Mm00444968_m1 |
| MGI:2145955        | Prkaa1   | protein kinase, AMP-activated, alpha 1 catalytic subunit                                                                             | 105787         | Mm01296700_m1 |
| MGI:1336173        | Prkaa2   | protein kinase, AMP-activated, alpha 2 catalytic subunit                                                                             | 108079         | Mm01264789_m1 |
| MGI:109354         | Ucp2     | uncoupling protein 2 (mitochondrial, proton carrier)                                                                                 | 22228          | Mm00627599_m1 |
| MGI:2140940        | Acacb    | acetyl-Coenzyme A carboxylase beta                                                                                                   | 100705         | Mm01204667_m1 |
| MGI:93830          | Adipor2  | adiponectin receptor 2                                                                                                               | 68465          | Mm01184032_m1 |
| MGI:1891766        | Camkk1   | calcium/calmodulin-dependent protein kinase kinase 1, alpha                                                                          | 55984          | Mm00517053_m1 |
| MGI:1098296        | Cpt1a    | carnitine palmitoyltransferase 1a, liver                                                                                             | 12894          | Mm01231183_m1 |
| MGI:1270849        | Rps6kb1  | ribosomal protein S6 kinase, polypeptide 1                                                                                           | 72508          | Mm01310033_m1 |
| MGI:1914930        | Sdhb     | succinate dehydrogenase complex, subunit B, iron sulfur (lp)                                                                         | 67680          | Mm00458272_m1 |
| MGI:1098280        | Crebbp   | CREB binding protein                                                                                                                 | 12914          | Mm01342452_m1 |
| MGI:2444934        | Ppargc1b | peroxisome proliferator activated receptor, gamma, coactivator 1 beta                                                                | 170826         | Mm00504720_m1 |
| MGI:107619         | Hrh1     | histamine receptor H1                                                                                                                | 15465          | Mm00434002_s1 |
| MGI:104741         | Nfkb1a   | nuclear factor of kappa light polypeptide gene enhancer in B cells inhibitor, alpha                                                  | 18035          | Mm00477800_g1 |
| MGI:1343098        | Aif1     | allograft inflammatory factor 1                                                                                                      | 11629          | Mm00479862_g1 |
| MGI:1339753        | Csf1     | colony stimulating factor 1 (macrophage)                                                                                             | 12977          | Mm00432686_m1 |
| MGI:95294          | Egfr     | epidermal growth factor receptor                                                                                                     | 13649          | Mm00433023_m1 |
| MGI:95558          | Flt1     | FMS-like tyrosine kinase 1                                                                                                           | 14254          | Mm00438980_m1 |
| MGI:106918         | Hif1a    | hypoxia inducible factor 1, alpha subunit                                                                                            | 15251          | Mm00468869_m1 |
| MGI:1929865        | Nampt    | nicotinamide phosphoribosyltransferase                                                                                               | 59027          | Mm00451938_m1 |
| MGI:97362          | Nos3     | nitric oxide synthase 3, endothelial cell                                                                                            | 18127          | Mm00435217_m1 |
| MGI:103038         | Stat3    | signal transducer and activator of transcription 3                                                                                   | 20848          | Mm01219775_m1 |
| MGI:95524          | Fgfr3    | fibroblast growth factor receptor 3                                                                                                  | 14184          | Mm00433294_m1 |
| MGI:3584514        | Gpr17    | G protein-coupled receptor 17                                                                                                        | 574402         | Mm02619401_s1 |
| MGI:1342005        | Mthfd1   | methylene tetrahydrofolate dehydrogenase (NADP+ dependent), methenyltetrahydrofolate cyclohydrolase, formyltetrahydrofolate synthase | 108156         | Mm00507092_m1 |
| MGI:1338850        | Mthfd2   | methylene tetrahydrofolate dehydrogenase (NAD+ dependent), methenyltetrahydrofolate cyclohydrolase                                   | 17768          | Mm00485276_m1 |
| MGI:104752         | Nfkbib   | nuclear factor of kappa light polypeptide gene enhancer in B cells inhibitor, beta                                                   | 18036          | Mm00456849_m1 |
| MGI:1921620        | Rptor    | regulatory associated protein of MTOR, complex 1                                                                                     | 74370          | Mm00712676_m1 |
| MGI:1923038        | Smurf1   | SMAD specific E3 ubiquitin protein ligase 1                                                                                          | 75788          | Mm00547102_m1 |
| MGI:2156367        | Tlr3     | toll-like receptor 3                                                                                                                 | 142980         | Mm01207404_m1 |
| MGI:96392          | Icam1    | intercellular adhesion molecule 1                                                                                                    | 15894          | Mm00516023_m1 |
| MGI:2661364        | Neu4     | sialidase 4                                                                                                                          | 241159         | Mm00620597_m1 |
| MGI:87904          | Actb     | actin, beta                                                                                                                          | 11461          | Mm00607939_s1 |
| MGI:88127          | B2m      | beta-2 microglobulin                                                                                                                 | 12010          | Mm00437762_m1 |
| MGI:88261          | Canx     | calnexin                                                                                                                             | 12330          | Mm00500330_m1 |
| MGI:88276          | Ctnnb1   | catenin (cadherin associated protein), beta 1                                                                                        | 12387          | Mm00483033_m1 |
| MGI:95640          | Gapdh    | glyceraldehyde-3-phosphate dehydrogenase                                                                                             | 14433          | Mm99999915_g1 |
| MGI:96217          | Hprt     | hypoxanthine guanine phosphoribosyl transferase                                                                                      | 15452          | Mm00446968_m1 |
| MGI:97555          | Pgk1     | phosphoglycerate kinase 1                                                                                                            | 18655          | Mm00435617_m1 |
| MGI:98889          | Ubc      | ubiquitin C                                                                                                                          | 22190          | Mm02525934_g1 |
| MGI:109484         | Ywhaz    | tyrosine 3-monooxygenase/tryptophan 5-monooxygenase activation protein, zeta polypeptide                                             | 22631          | Mm03950126_s1 |
